# Supplementary material for: A Comparative Study of Hummingbirds and Chickens Provides Mechanistic Insight on the Histidine Containing Dipeptide Role in Skeletal Muscle Metabolism
Source: PubMed Central journal article supplement (PMC6170442; doi:10.1038/s41598-018-32636-3), 2018-10-03
Supplement: 41598_2018_32636_MOESM1_ESM.pdf [file 41598_2018_32636_MOESM1_ESM.pdf]

**SUPPLEMENTARY FILE ONE: Western Blots Images**

**A Comparative Study of Hummingbirds and Chickens Provides Mechanistic Insight on the Histidine Containing Dipeptide Role in Skeletal Muscle Metabolism**

*Dolan E<sup>1</sup>, Saunders B<sup>1</sup>, Dantas WS<sup>1</sup>, Murai IH<sup>1</sup>, Roschel H<sup>1</sup>, Artioli GG<sup>1</sup>, Harris R<sup>2</sup>, Bicudo JEPW<sup>3</sup>, Sale C<sup>4</sup>, \*Gualano B<sup>1</sup>.*

1: Applied Physiology and Nutrition Research Group, Rheumatology Division; Faculdade de Medicina FMUSP, Universidade de Sao Paulo, Sao Paulo, SP, BR, University of São Paulo, SP, BR.

2: Junipa Ltd; Newmarket; Suffolk; United Kingdom.

3: School of Biological Sciences; University of Wollongong; Australia.

4: Sport, Health and Performance Enhancement Research Centre; Musculoskeletal Physiology Research Group; School of Science and Technology; Nottingham Trent University; United Kingdom.

**Corresponding Author:**

Professor Bruno Gualano

Applied Physiology & Nutrition Research Group.

Rheumatology Division,

Faculdade de Medicina FMUSP, Universidade de São Paulo,

Sao Paulo, Brazil.

Phone: +55 11 2648-1337; Fax: +55 11 3061-7490;

**E-mail:** [gualano@usp.br](mailto:gualano@usp.br)

**Complete COX IV (17kDa) gels:**

**Gel 1:**

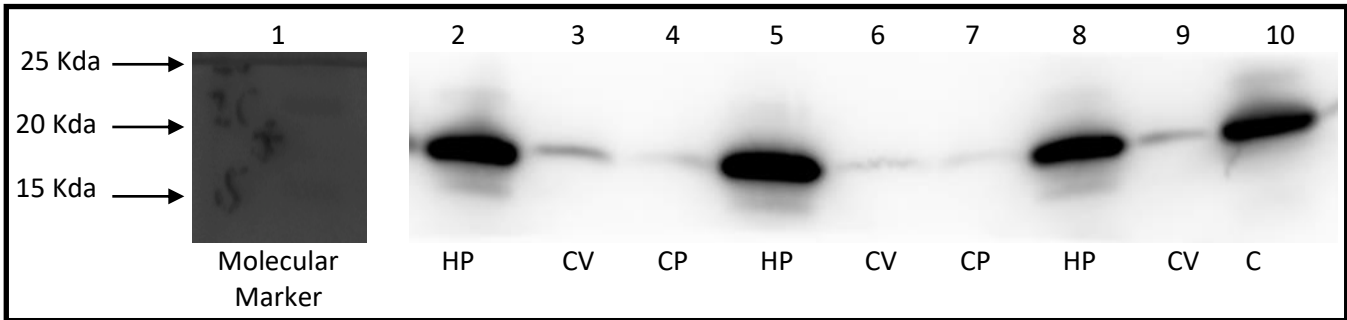

**Gel 2:**

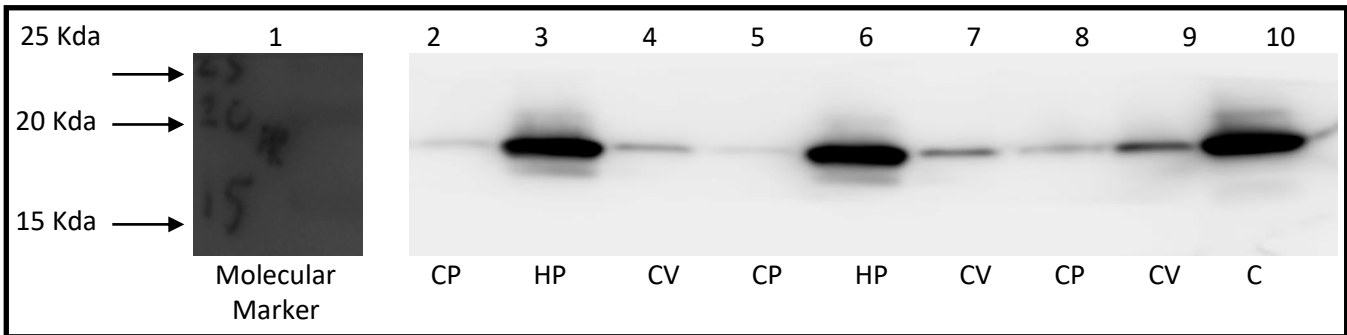

HP: Hummingbird *m. pectoralis*; CV: Chicken *m. vastus lateralis*; CP: chicken *m. pectoralis*; C: Control (human *m. vastus lateralis* with 40mg of protein)

**Complete LDH (37kDa) gels:**

**Gel 1:**

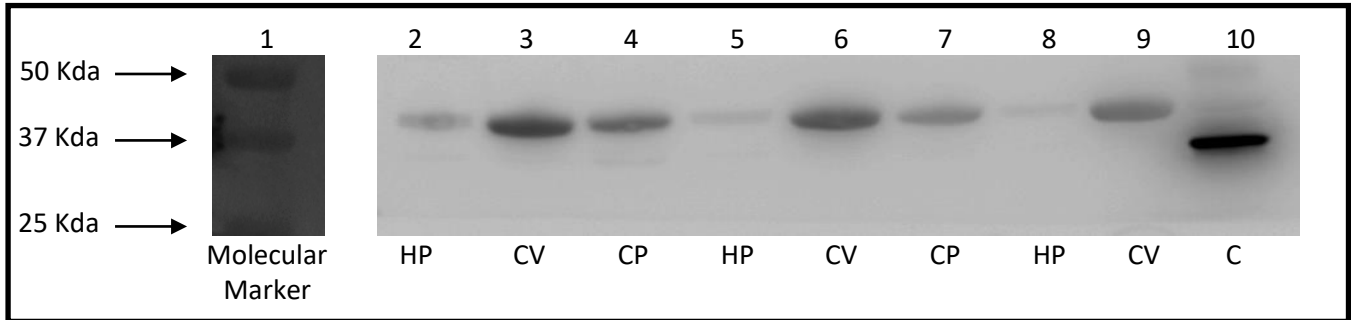

**Gel 2:**

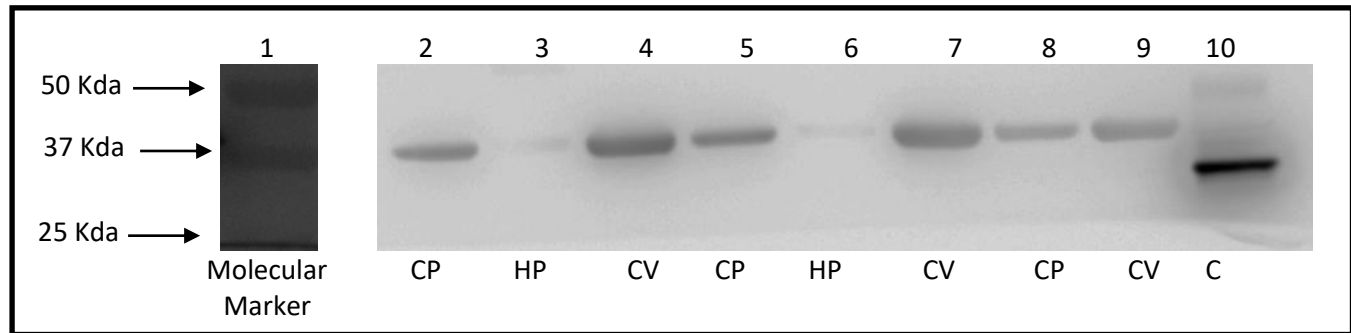

HP: Hummingbird *m. pectoralis*; CV: Chicken *m. vastus lateralis*; CP: chicken *m. pectoralis*; C: Control (human *m. vastus lateralis* with 40mg of protein)

**Protein Transfer visualised using Ponceau Staining**

**Gel 1:**

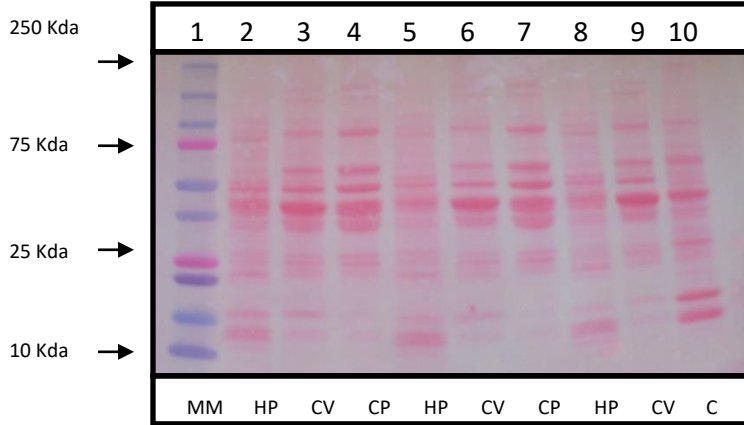

**Gel 2:**

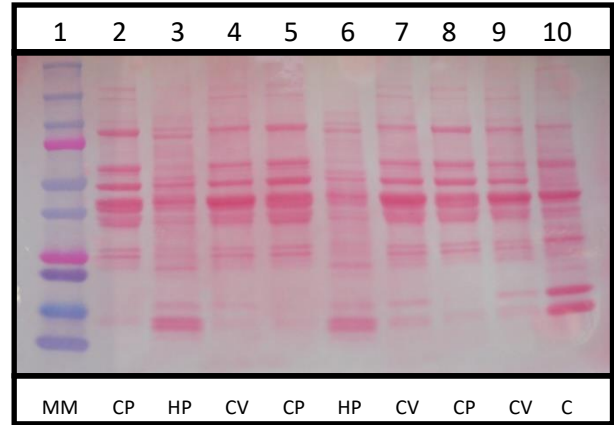

MM: Molecular Mass Marker; HP: Hummingbird *m. pectoralis*; CV: Chicken *m. vastus lateralis*; CP: Chicken *m. pectoralis*; C: Control (human *m. vastus lateralis* with 40mg of protein)
